# Supplementary material for: Fluorous protic ionic liquids exhibit discrete segregated nano-scale solvent domains and form new populations of nano-scale objects upon primary alcohol addition
Source: Royal Society of Chemistry journal article supplement (doi:10.1039/c3cp44589e), 2013-01-01
Supplement: c3cp44589e.pdf [file c3cp44589e.pdf]

## Fluorous protic ionic liquids exhibit discrete segregated nano-scale solvent domains and form new populations of nano-scale objects upon primary alcohol addition

Tamar L. Greaves<sup>a\*</sup>, Danielle F. Kennedy<sup>a</sup>, Yan Shen<sup>a,b</sup>, Adrian Hawley<sup>c</sup>, Gonghua Song<sup>b</sup>, Calum J. Drummond<sup>a</sup>

<sup>a</sup> CSIRO Materials Science and Engineering, Bag 10, Clayton, Vic. 3169, Australia.

<sup>b</sup> Shanghai Key Laboratory of Chemical Biology, School of Pharmacy, East China University of Science and Technology, Shanghai 200237, PR China

<sup>c</sup> Australian Synchrotron, 800 Blackburn Road, Clayton, Vic. 3168, Australia

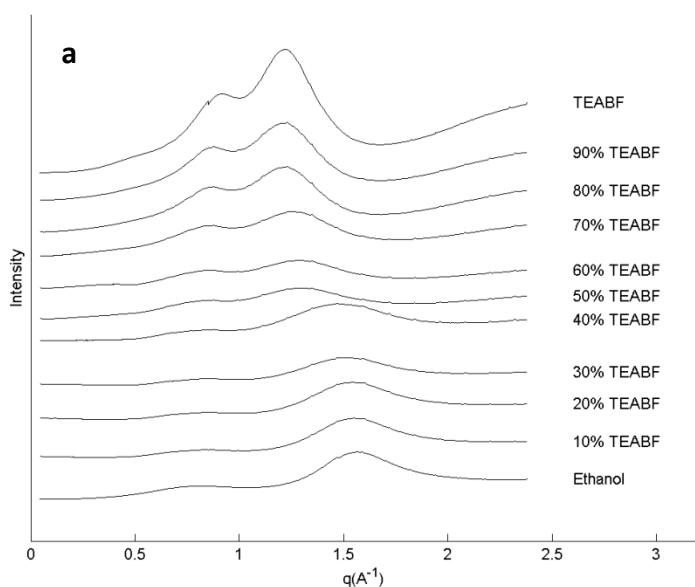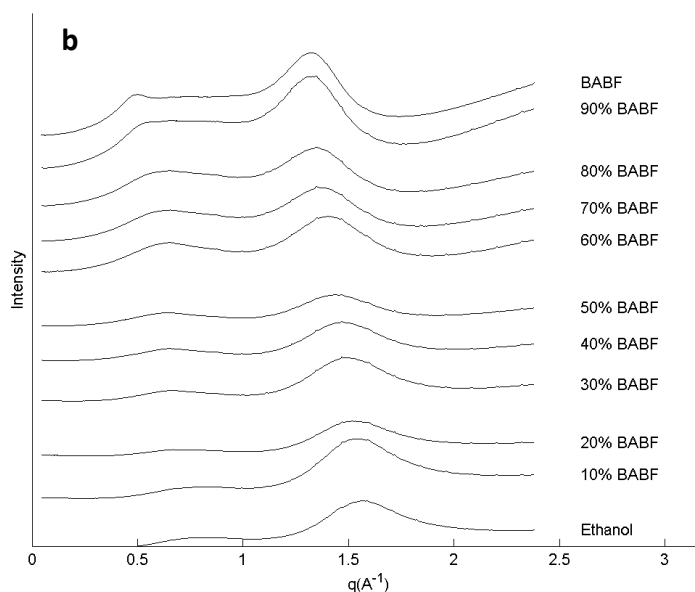

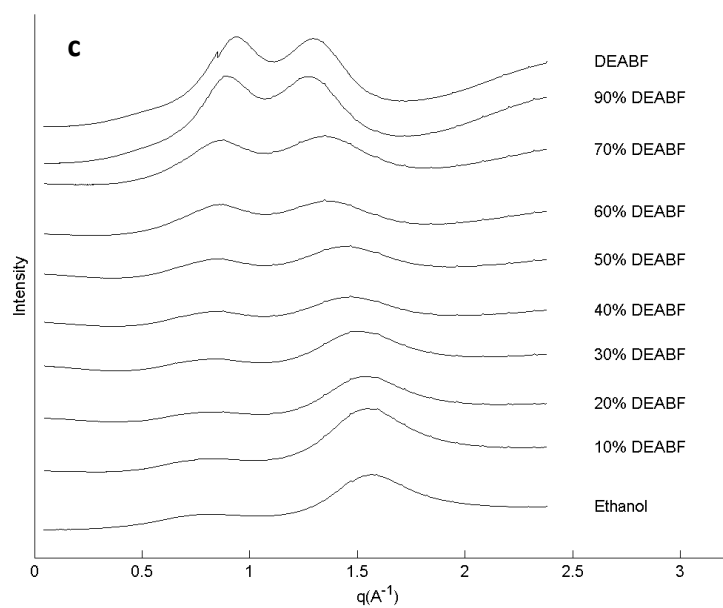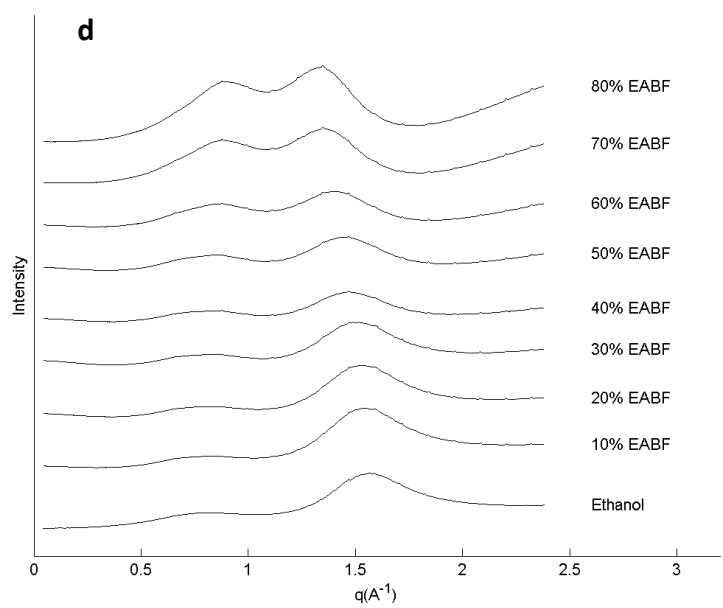

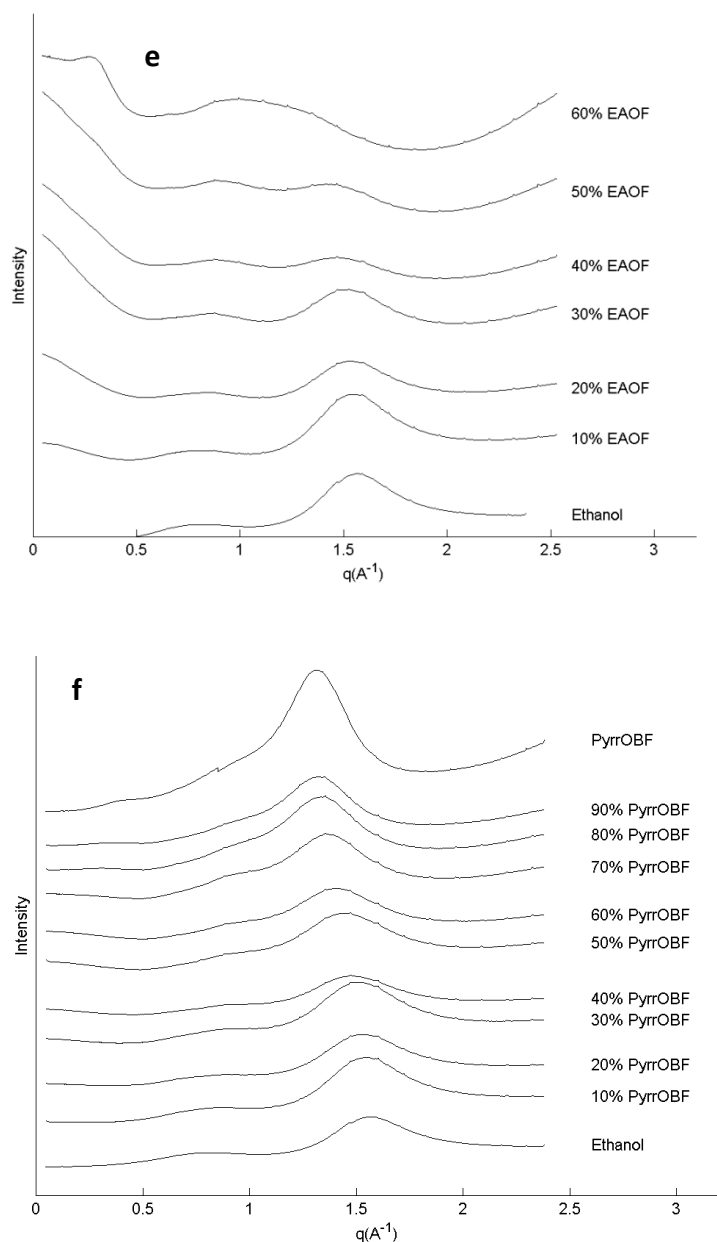

Figure S1. SAXS/WAXS profiles for FPILs with ethanol for a) TEABF, b) BABF, c) DEABF, d) EABF, e) EAOF and f) PyrroBF. The profiles have been offset in intensity. The neat FPILs which are crystalline, or partially crystalline, have been omitted.

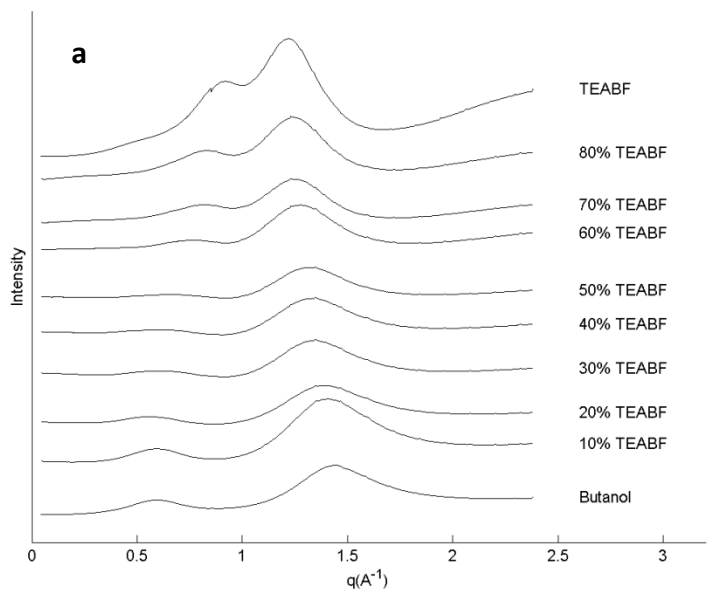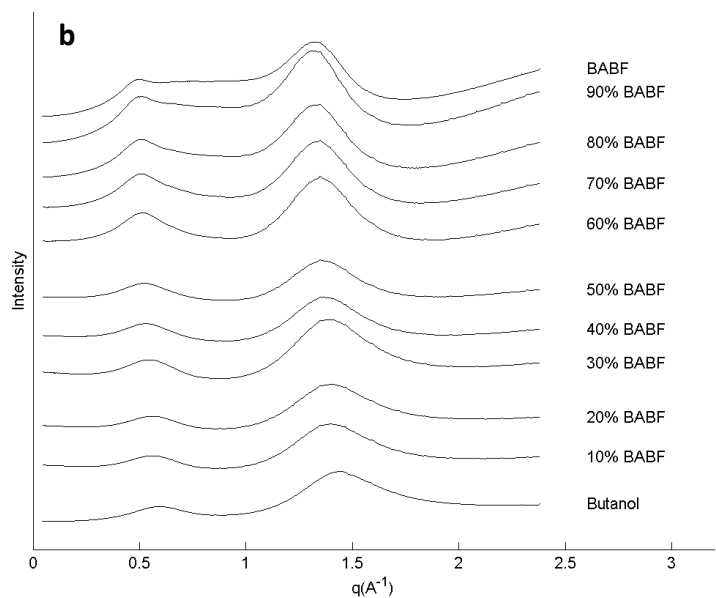

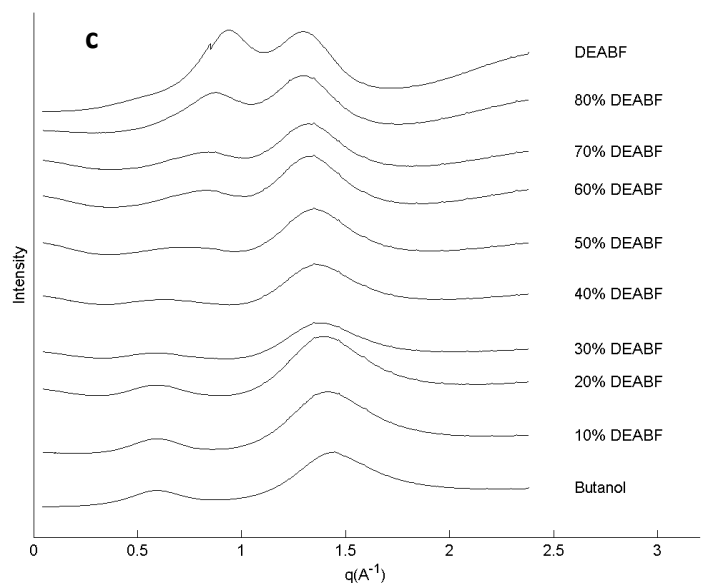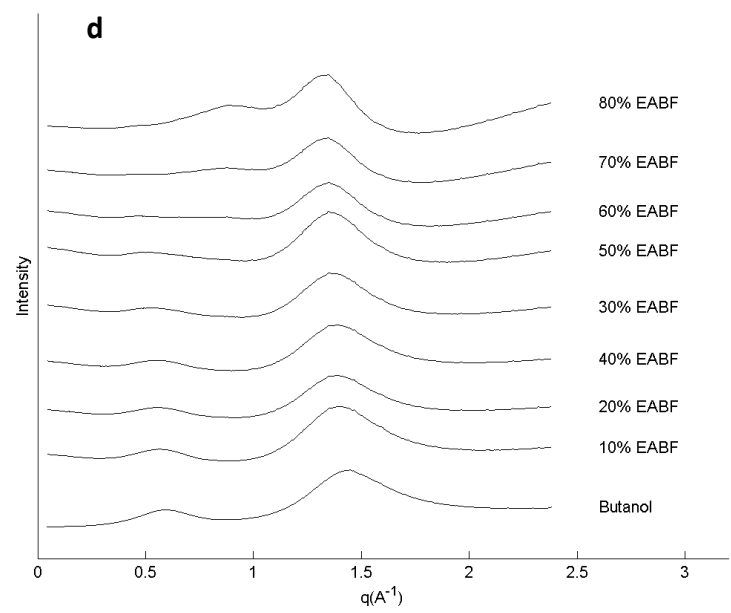

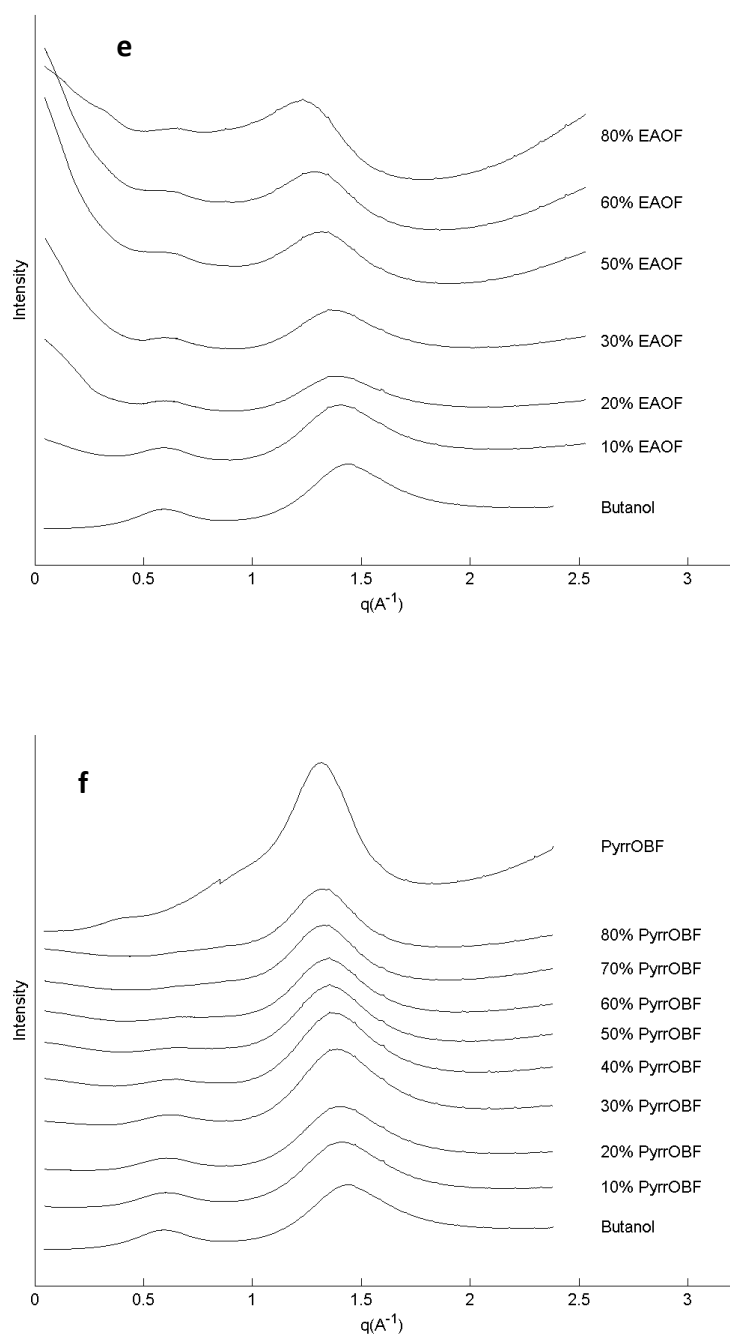

Figure S2. SAXS/WAXS profiles for FPILs with butanol a) TEABF, b) BABF, c) DEABF, d) EABF, e) EAOF and f) PyrOBF. The profiles have been offset in intensity. The neat FPILs which are crystalline, or partially crystalline, have been omitted.

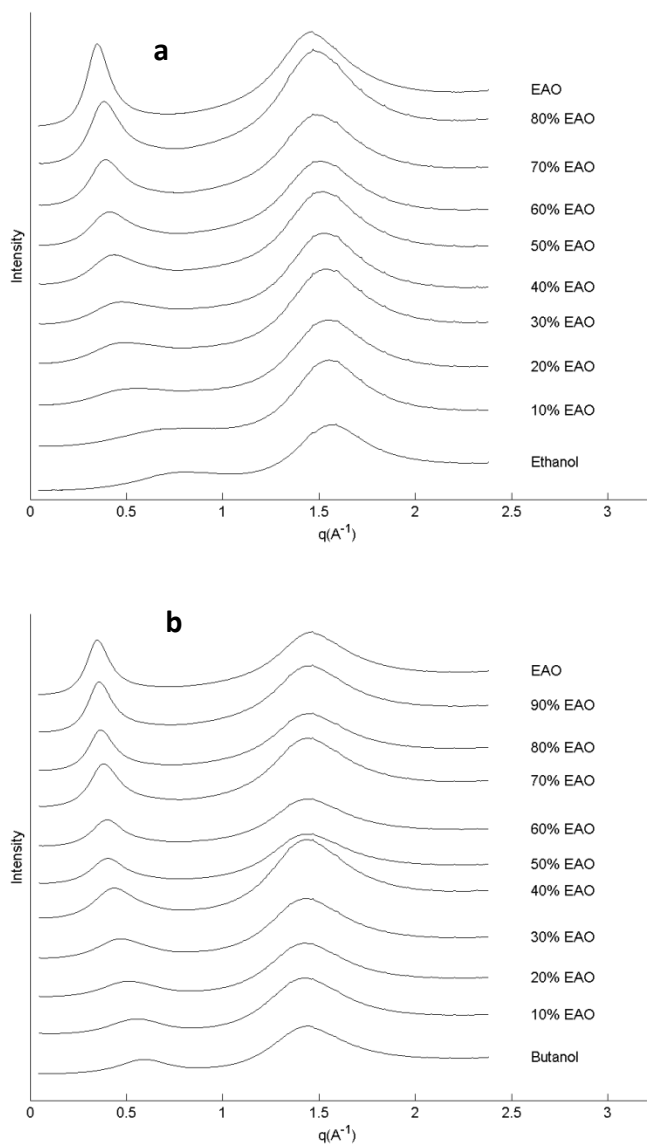

Figure S3. SAXS/WAXS profiles for EAO with a) ethanol and b) butanol. The profiles have been offset in intensity.
